# Supplementary material for: Contrasting particle fluxes and composition in a submarine canyon affected by natural sediment transport events and bottom trawling
Source: Frontiers journal article supplement (doi:10.3389/fmars.2022.1017052), 2022-10-26
Supplement: Data_Sheet_1.PDF [file Data_Sheet_1.PDF]

## Supplementary Material

### 1 Supplementary Figures and Tables

**Table S1.** Origin and composition of compound classes derived from CuO products

| CuO product              | Sub-products                                                                                                                                                                                                                                                                                                                                                                    | Origin                   | Additional information                                                                                                                       |
|--------------------------|---------------------------------------------------------------------------------------------------------------------------------------------------------------------------------------------------------------------------------------------------------------------------------------------------------------------------------------------------------------------------------|--------------------------|----------------------------------------------------------------------------------------------------------------------------------------------|
| Vanillyl phenols (VP)    | Vanillin (Vl),<br>Acetovanillone (Vn),<br>Vanillic acid (Vd)                                                                                                                                                                                                                                                                                                                    | Terrestrial <sup>1</sup> | Angiosperm and gymnosperm plants <sup>1</sup>                                                                                                |
| Syringyl phenols (SP)    | Syringaldehyde (Sl),<br>Acetosyringone (Sn),<br>Syringic acid (Sd)                                                                                                                                                                                                                                                                                                              | Terrestrial <sup>1</sup> | Angiosperm plants <sup>1</sup>                                                                                                               |
| Cinnamyl phenols (CP)    | p-Coumaric acid (pCd),<br>Ferulic acid (Fd)                                                                                                                                                                                                                                                                                                                                     | Terrestrial <sup>1</sup> | Non-woody vascular plant tissues (i.e. leaves, needles, grasses) <sup>1</sup>                                                                |
| Cutin acids (CA)         | 16-Hydroxyhexadecanoic acid (w-C <sub>16</sub> ),<br>Hexadecan-1,16-dioic acid (C <sub>16</sub> DA),<br>8 or 9 or 10,16-Dihydroxy C <sub>16</sub> acids(x,w-C <sub>16</sub> ),<br>7 or 8-Dihydroxy C <sub>16</sub> α,ω-dioic acid (x-C <sub>16</sub> DA)                                                                                                                        | Terrestrial              | Non-woody tissues (i.e. leaves, needles, grasses) <sup>2</sup>                                                                               |
| p-hydroxybenzenes (PB)   | p-Hydroxyacetophenone (Pn),<br>p-Hydroxybenzaldehyde (Pl),<br>p-Hydroxybenzoic acid (Pd)                                                                                                                                                                                                                                                                                        | Heterogenous             | Terrestrial: woody and herbaceous tissues <sup>3,4</sup><br>Marine: phytoplankton and bacterial biomass <sup>3,4</sup>                       |
| Benzoic acids (BA)       | Benzoic acid (Bd),<br>m-Hydroxybenzoic acid (mBd),<br>3,5-Dihydroxybenzoic acid (3,5-Bd)                                                                                                                                                                                                                                                                                        | Heterogenous             | Terrestrial: humification processes in soil <sup>3,4</sup><br>Marine: phytoplankton biomass <sup>3,4</sup>                                   |
| Amino acids (AA)         | Butan-1,4-dioic acid (C <sub>4</sub> DA),<br>2-Buten-1,4-dioic acid (C <sub>4</sub> DA:1),<br>2-Carboxypyrrole acid (Cp),<br>Phenylglyoxylic acid (Pg)                                                                                                                                                                                                                          | Heterogenous             | Terrestrial: proteic material (i.e. bacteria, fungi) <sup>3</sup><br>Marine: proteic material (i.e. zooplankton, phytoplankton) <sup>3</sup> |
| Di-carboxylic acids (DA) | Penten-1,5-dioic acid (C <sub>5</sub> DA),<br>Hexan-1,6-dioic acid (C <sub>6</sub> DA),<br>Heptan-1,7-dioic acid (C <sub>7</sub> DA),<br>Octan-1,8-dioic acid (C <sub>8</sub> DA),<br>Nonan-1,9-dioic acid (C <sub>9</sub> DA),<br>Decan-1,10-dioic acid (C <sub>10</sub> DA),<br>Undecan-1,11-dioic acid (C <sub>11</sub> DA),<br>Dodecan-1,12-dioic acid (C <sub>12</sub> DA) | Heterogenous             | Terrestrial: multiple sources, abundant in soil, bacteria <sup>3</sup><br>Marine: multiple sources, abundant in phytoplankton <sup>3</sup>   |
| Fatty acids (FA)         | Decanoic acid (C <sub>10</sub> FA),<br>Dodecanoic acid (C <sub>12</sub> FA),<br>Tetradecanoic acid (C <sub>14</sub> FA),<br>Hexadecanoic acid (C <sub>16</sub> FA:1),<br>Hexadecanoic acid (C <sub>16</sub> FA),<br>Octadecanoic acid (C <sub>18</sub> FA:1),<br>Octadecanoic acid (C <sub>18</sub> FA)                                                                         | Heterogenous             | Terrestrial: lipidic material (i.e. bacteria, fungi) <sup>3</sup><br>Marine: lipidic material (i.e. zooplankton, phytoplankton) <sup>3</sup> |

<sup>1</sup>Hedges and Mann, 1979; <sup>2</sup>Goñi and Hedges, 1990; <sup>3</sup>Goñi and Hedges, 1995; <sup>4</sup>Prahl et al., 1994

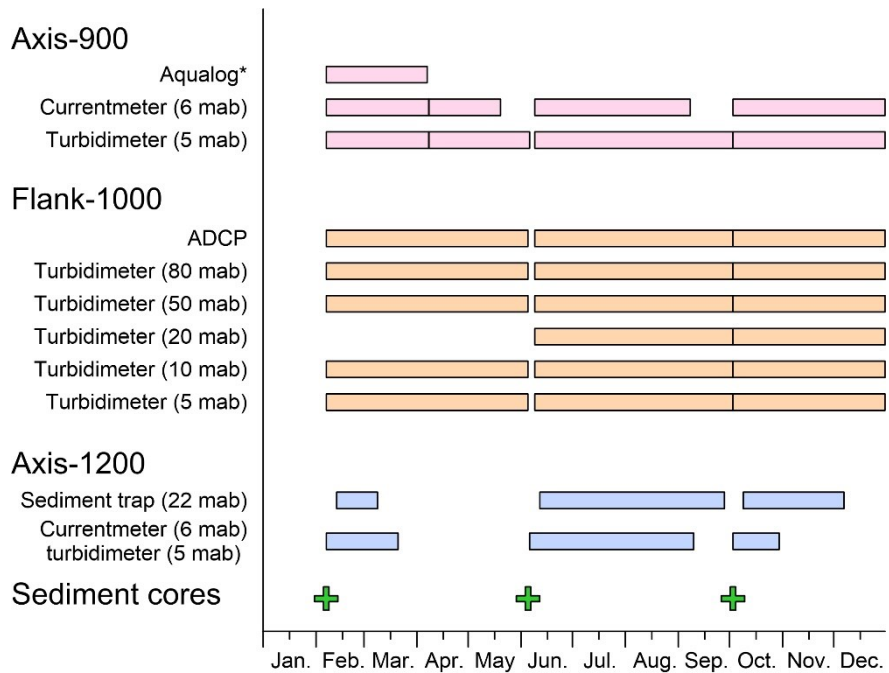

**Figure S1.** Time diagram of the available time series from the instruments installed in the Axis-900, in the Flank-1000 and in the Axis-1200 moorings. \*Data of the Aqualog and the corresponding current meter and turbidimeter of that time-frame are presented in detail in Arjona-Camas et al., 2021.

## Legend

Monthly fishing effort

Hauls ha<sup>2</sup>

<1

1-5

5-10

10-15

>15

0 10 20 km

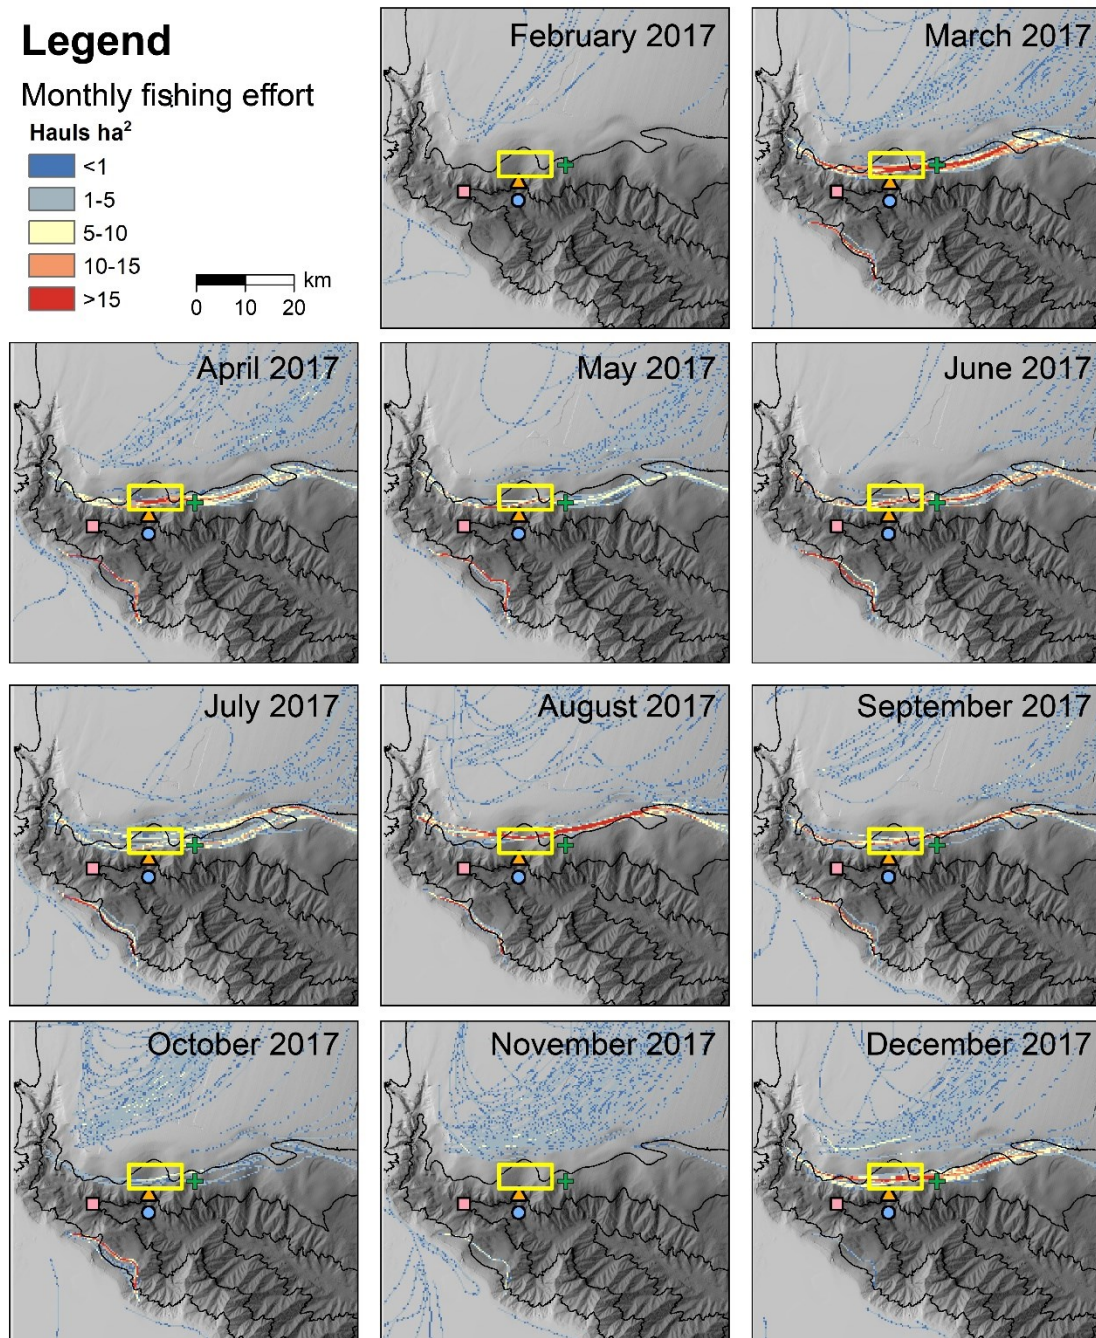

**Figure S2.** Monthly fishing effort (hauls per hectare) in Palamós Canyon from February to December 2017.

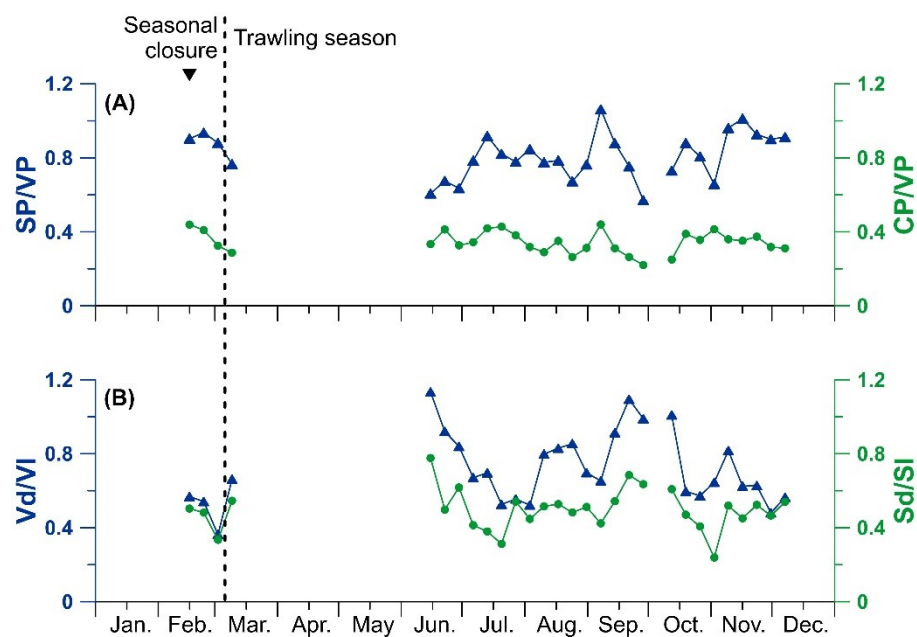

**Figure S3.** Temporal evolution of terrigenous biomarker signatures. **a)** syringyl to vanillyl ratios (SP/VP) and cinnamyl to vanillyl ratios (CP/VP). **b)** acid to aldehyde ratios of vanillic acid to vanillin (Vd/Vl) and syringic acid to syringaldehyde (Sd/SI).

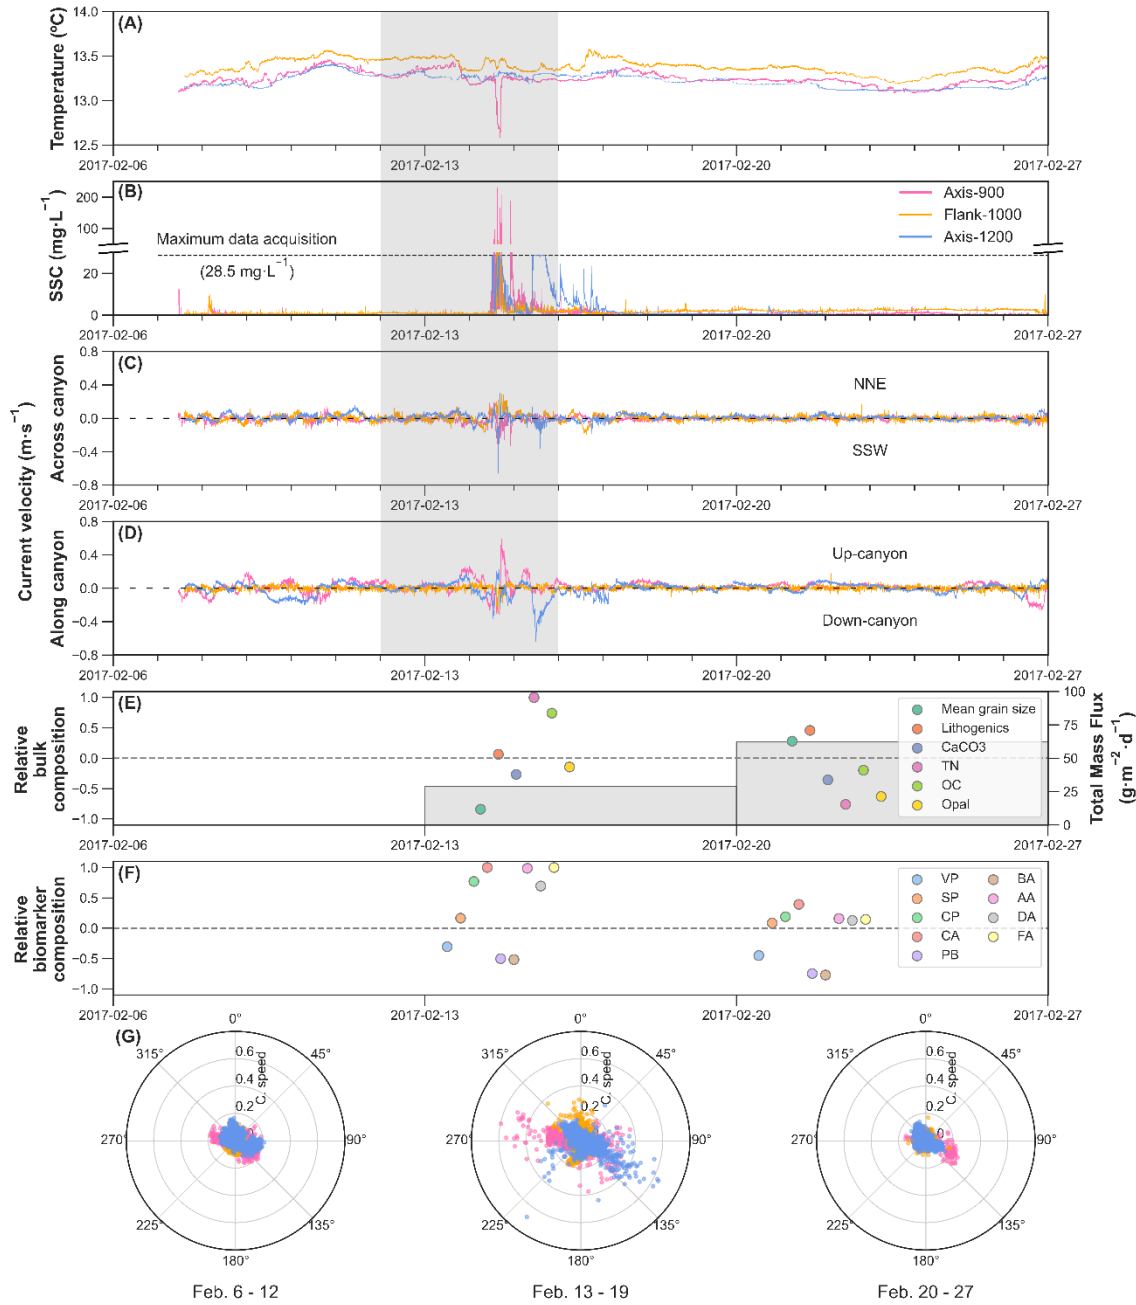

**Figure S4.** Time-series during the eastern storm in February: **(A)** temperature, **(B)** suspended sediment concentration (SSC), **(C)** across-canyon current velocity, and **(D)** along-canyon current velocity of Axis-900, Axis-1200, and Flank-1000 moorings at 5 mab (Axis-900 and Axis-1200) and 10 mab (Flank-1000). Weekly values of **(E)** total mass flux and relative variations of bulk composition, **(F)** relative variations in the biomarker compound classes, and **(G)** polar plots of current direction and current speed (radius) at 5 mab (Axis-900 and Axis-1200) and 10 mab (Flank-1000). The relative contribution of the sediment trap composition (**(E)** and **(F)**) are weekly averages, and their position along the x-axis are just to simplify the graphical visualization. Note the maximum data acquisition of SSC for Axis-1200 (28.5 mg·L<sup>-1</sup>). The extension of the February eastern storm and dense shelf water cascading event is marked by a grey rectangle in **(A)** to **(D)**, and not in **(E)** to **(G)** since these subplots represent weekly average values.



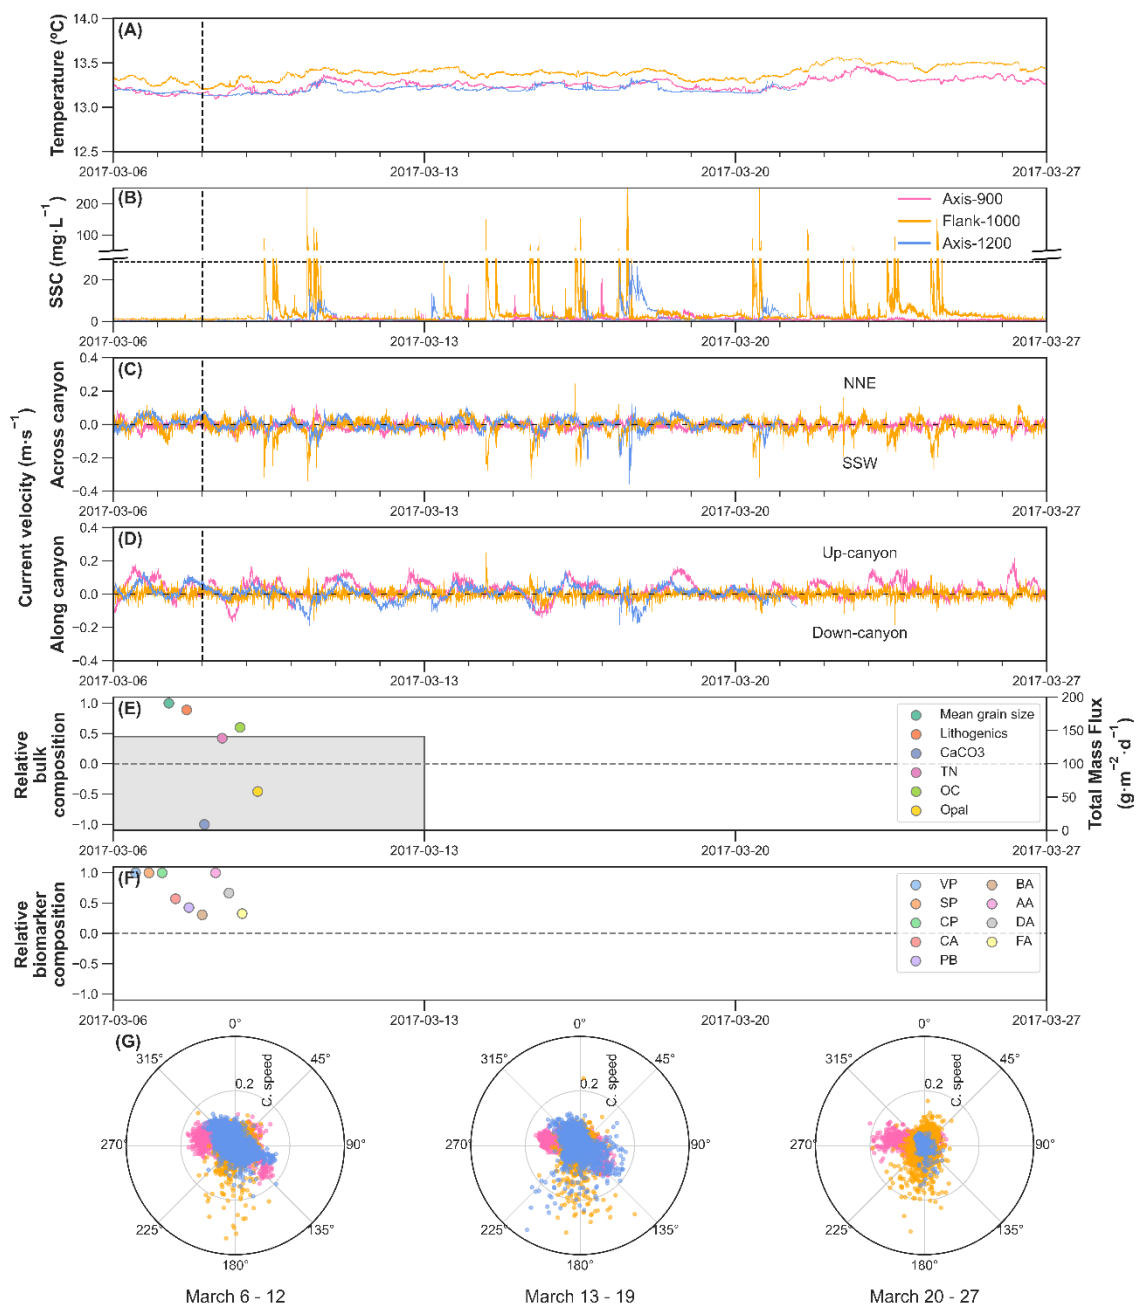

**Figure S5.** Time-series during the beginning of the trawling season: **(A)** temperature, **(B)** suspended sediment concentration (SSC), **(C)** across-canyon current velocity, and **(D)** along-canyon current velocity of Axis-900, Axis-1200, and Flank-1000 moorings at 5 mab (Axis-900 and Axis-1200) and 10 mab (Flank-900). Weekly values of **(E)** total mass flux and relative variations of bulk composition, **(F)** relative variations in the biomarker compound classes, and **(G)** polar plots of current direction and current speed (radius) at 5 mab (Axis-900 and Axis-1200) and 10 mab (Flank-1000). The relative contribution of the sediment trap composition (**(E)** and **(F)**) are weekly averages, and their position along the x-axis are just to simplify the graphical visualization. Note the maximum data acquisition of SSC for Axis-1200 (28.5 mg·L<sup>-1</sup>) and that sensors recorded data until March 21 (Fig. S1). The vertical dashed line in **(A)** to **(D)** represents the onset of bottom trawling activity on March 8, which is not shown in **(E)** to **(G)** since these subplots represent weekly average values.

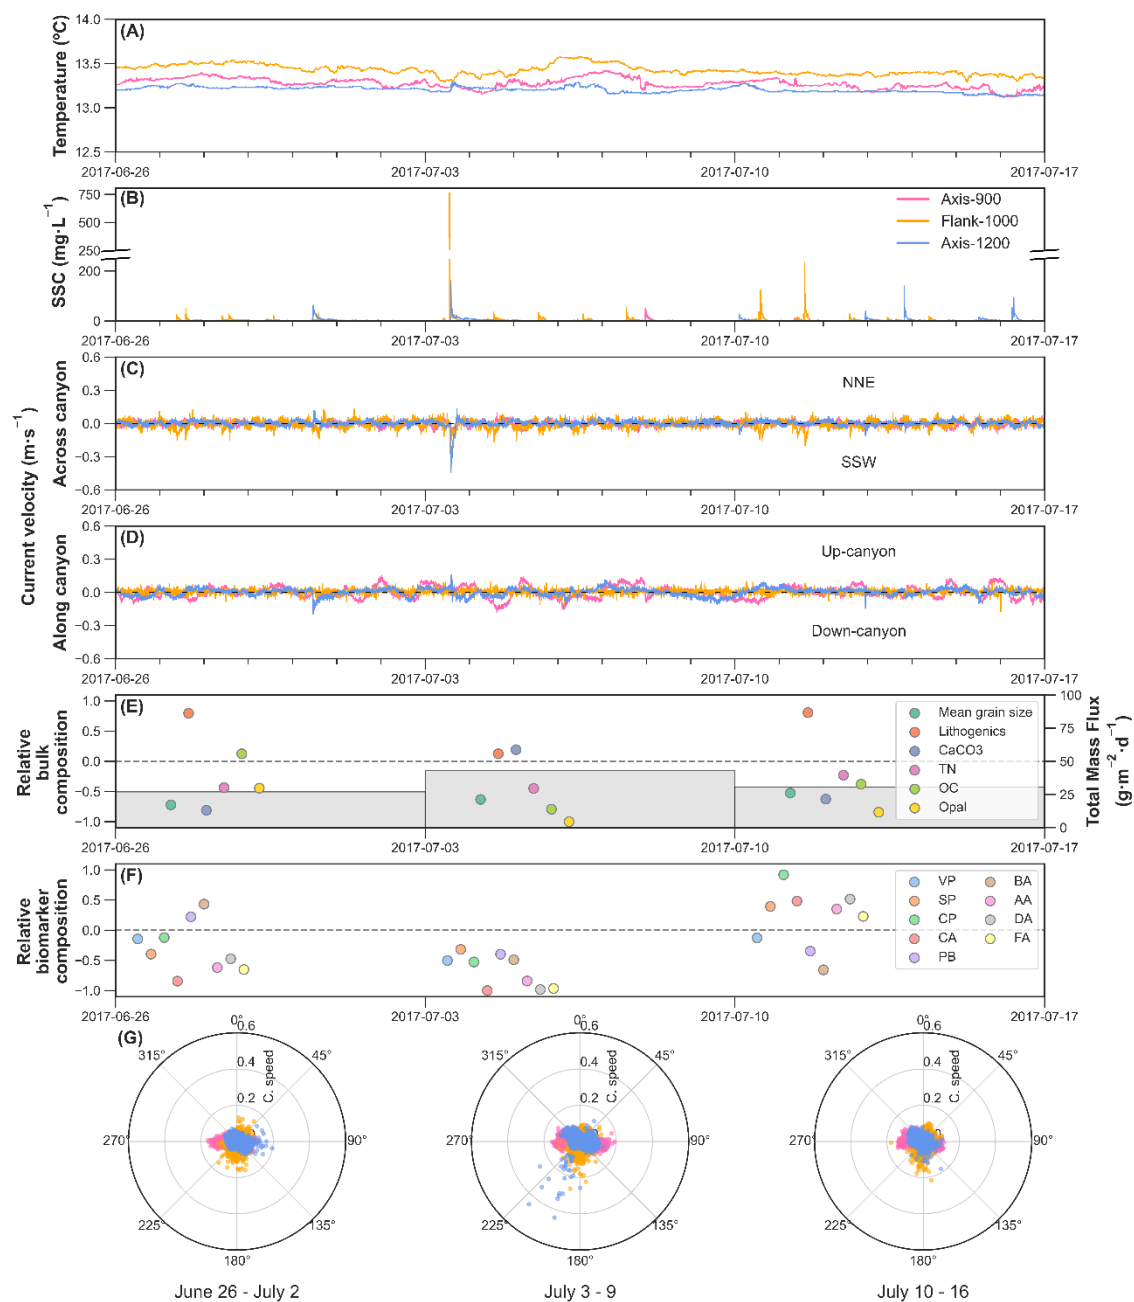

**Figure S6.** Time-series of three specific weeks during the trawling season: **(A)** temperature, **(B)** suspended sediment concentration (SSC), **(C)** across-canyon current velocity, and **(D)** along-canyon current velocity of Axis-900, Axis-1200, and Flank-1000 moorings at 5 mab (Axis-900 and Axis-1200) and 10 mab (Flank-1000). Weekly values of **(E)** total mass flux and relative variations of bulk composition, **(F)** relative variations in the biomarker compound classes, and **(G)** polar plots of current direction and current speed (radius) at 5 mab (Axis-900 and Axis-1200) and 10 mab (Flank-1000). The relative contribution of the sediment trap composition **(E)** and **(F)** are weekly averages, and their position along the x-axis are just to simplify the graphical visualization.

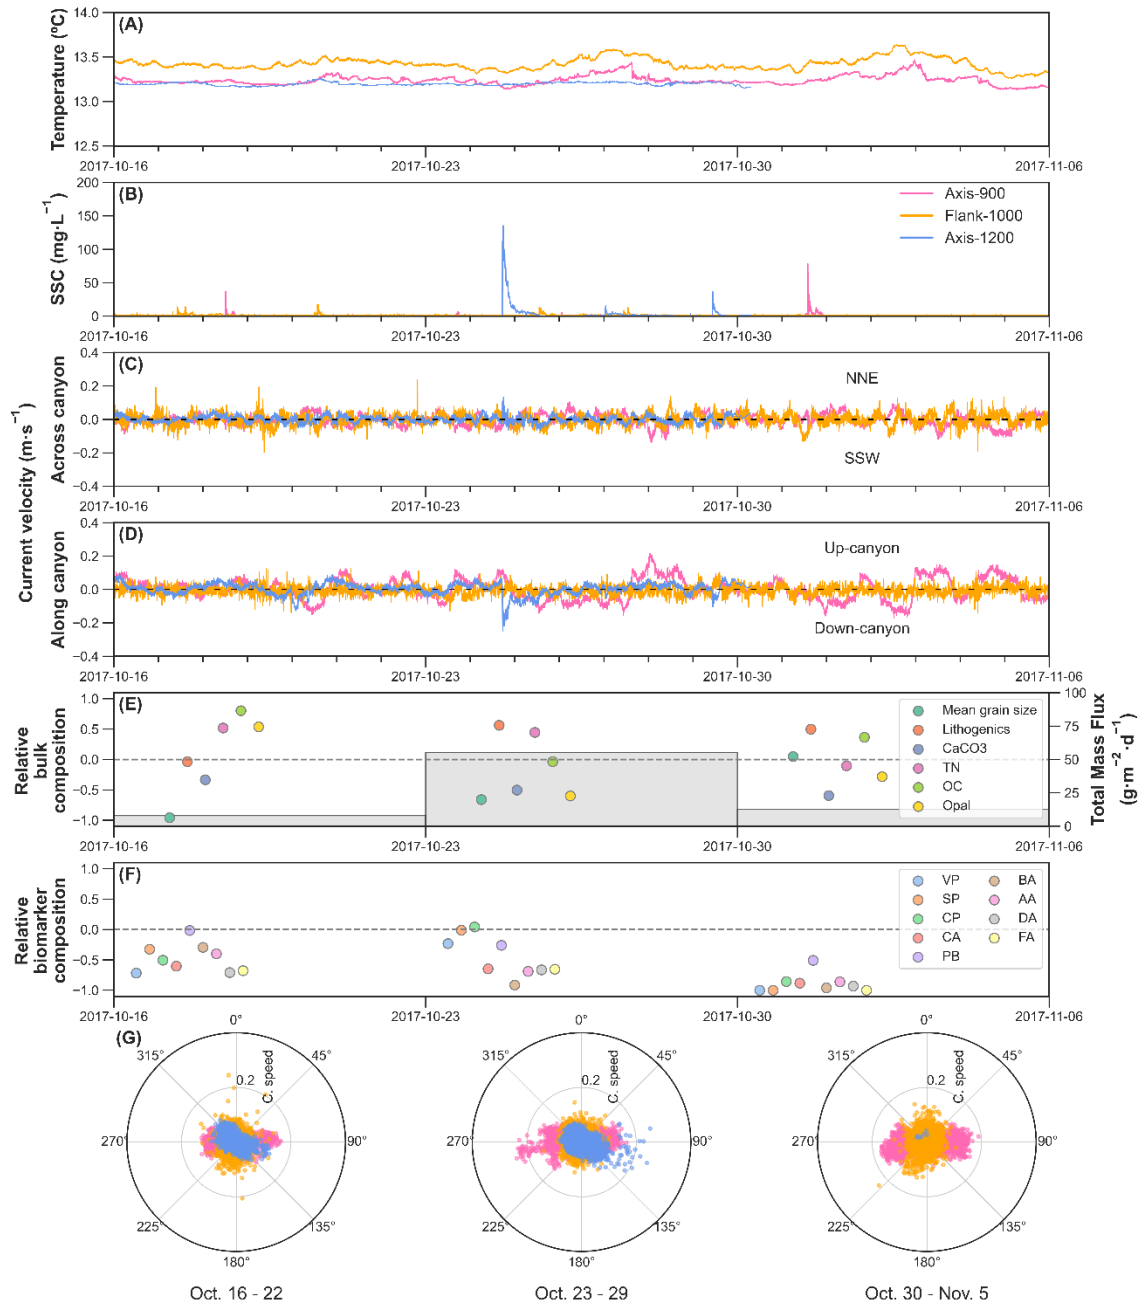

**Figure S7.** Time-series of the late-October sediment transport event during the intermission of bottom trawling in the adjacent flank: **(A)** temperature, **(B)** suspended sediment concentration (SSC), **(C)** across-canyon bottom current speed, and **(D)** along-canyon current velocity of Axis-900, Axis-1200 and Flank-1000 moorings at 5 mab (Axis-900) and 10 mab (Flank-1000). Weekly values of **(E)** total mass flux and relative variations of bulk composition, **(F)** relative variations in the biomarker compound classes, and **(G)** polar plots of current direction and current speed (radius) at 5 mab (Axis-900 and Axis-1200) and 10 mab (Flank-1000). The relative contribution of the sediment trap composition (**(E)** and **(F)**) are weekly averages, and their position along the x-axis are just to simplify the graphical visualization. Note that the sensors of Axis-1200 recorded data until October 30 (Fig. S1).



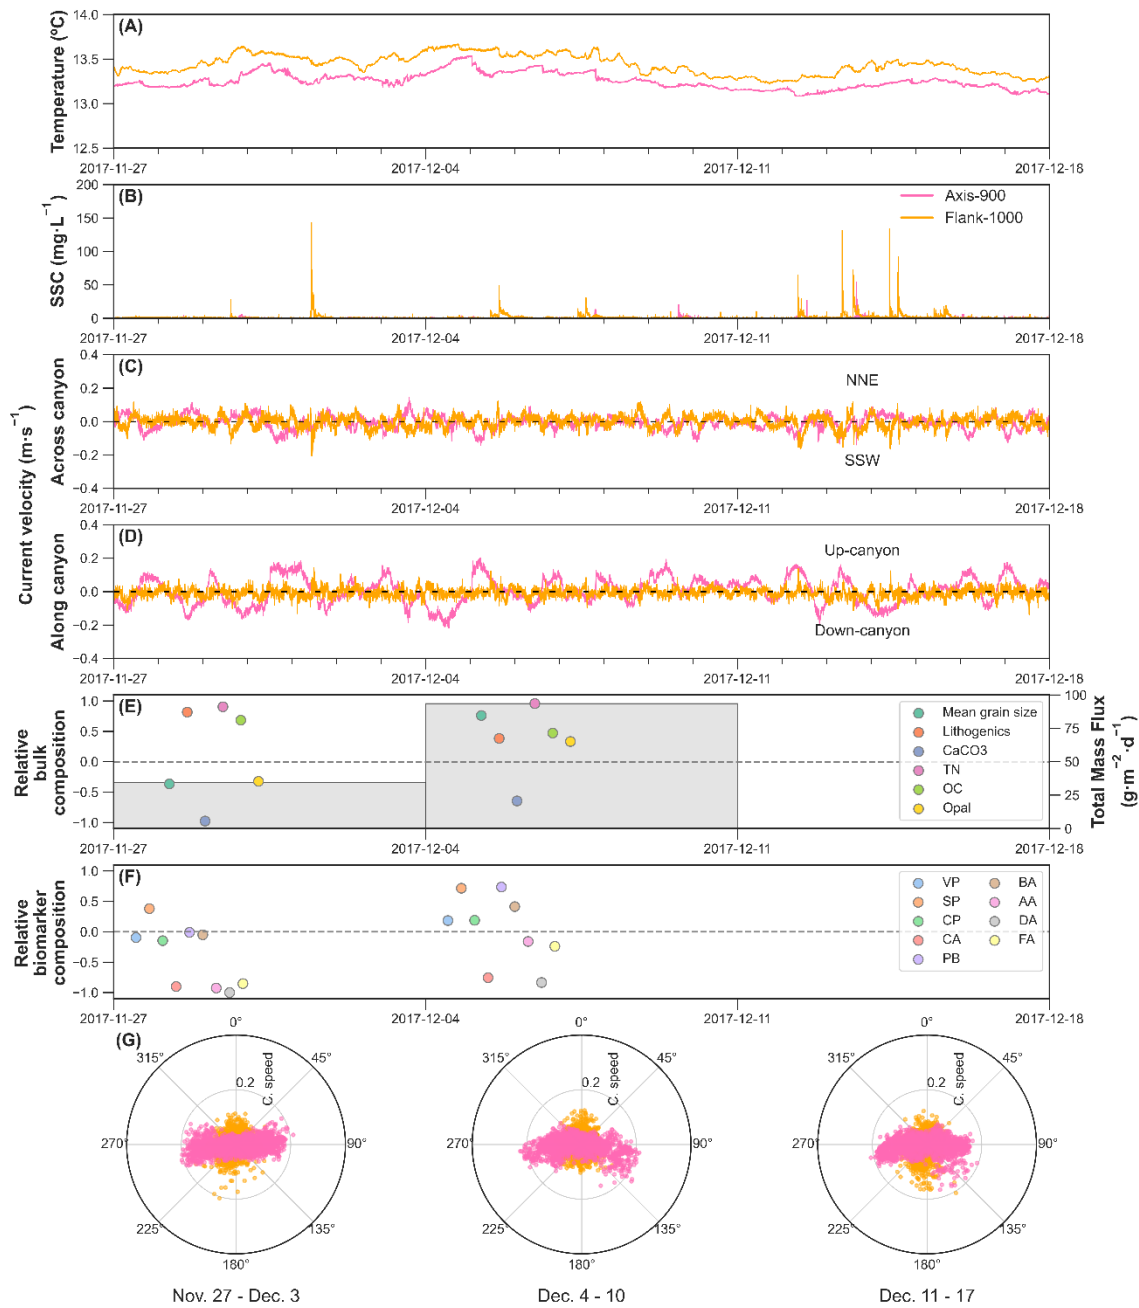

**Figure S8.** Time-series of the intermission of bottom trawling activities in November and its resume in early December: **(A)** temperature, **(B)** suspended sediment concentration (SSC), **(C)** across-canyon current velocity, and **(D)** along-canyon current velocity of Axis-900 and Flank-1000 moorings at 5 mab (Axis-900) and 10 mab (Flank-1000). Weekly values of **(E)** total mass flux and relative variations of bulk composition, **(F)** relative variations in the biomarker compound classes, and **(G)** polar plots of current direction and current speed (radius) at 5 mab (Axis-900) and 10 mab (Flank-1000). The relative contribution of the sediment trap composition **((E) and (F))** are weekly averages, and their position along the x-axis are just to simplify the graphical visualization. Note that the sensors of Axis-1200 mooring didn't work during this period (Fig. S1).
